# Supplementary material for: Effects of a Mindfulness-Based Intervention for Police Officers
Source: Springer Nature journal article supplement (doi:10.1007/s12671-021-01631-7), 2021-05-12
Supplement: MOESM1 [file 19158584]

**Supplementary Material**

**Tables**

**Table 1**

*Overview of program components and exercises per week*

| Week | Content | Chapters* | Homework |
| --- | --- | --- | --- |
| 1 | Awareness | 5 and 6 | Breath and body meditation |
|  | Autopilot |  | Body scan meditation |
|  |  |  | Befriending meditation |
|  |  |  | Eating at least one meal with awareness |
| 2 | The mouse in the maze | 7 and 8 | Breath and body meditation |
|  | Beyond the rumor mill |  | Sounds and thoughts meditation |
|  |  |  | Three minute breathing space |
| 3 | Turning toward difficulties | 9 | Mindful movement meditation |
|  |  |  | Exploring difficulty meditation |
|  |  |  | Three minute breathing space |
| 4 | Trapped in the past or living in the present | 10 | Body scan meditation |
|  |  |  | Befriending meditation |
|  |  |  | Three minute breathing space |
|  |  |  | Doing something kind for someone |
| 5 | When did you stop dancing? | 11 | Nourishing meditation: choose a meditation that nourished you |
|  |  |  | Underexposed meditation |
|  |  |  | Silent mediation |
|  |  |  | Three minute breathing space |
| 6 | Your wild and precious life | 12 | How to make meditation exercises a part of your daily routine |

* Chapters from the book of Williams and Penman (2011).

**Table 2**

*Correlations between scores of change for (facets of) mindfulness, attention, self-compassion and measures of stress*

|  |  | 1 | 2 | 3 | 4 | 5 | 6 | 7 | 8 | 9 | 10 | 11 |
| --- | --- | --- | --- | --- | --- | --- | --- | --- | --- | --- | --- | --- |
| 1 | ∆Mindfulness Total |  |  |  |  |  |  |  |  |  |  |  |
| 2 | ∆Attention | .30* |  |  |  |  |  |  |  |  |  |  |
| 3 | ∆Self-compassion | .62*** | .10 |  |  |  |  |  |  |  |  |  |
| Facets of mindfulness | |  |  |  |  |  |  |  |  |  |  |  |
| 4 | ∆Observing | .55*** | .35** | .19 |  |  |  |  |  |  |  |  |
| 5 | ∆Non-reactivity | .55*** | .13 | .13 | .32* |  |  |  |  |  |  |  |
| 6 | ∆Describing | .70*** | .02 | .49*** | .20 | .23+ |  |  |  |  |  |  |
| 7 | ∆Acting with awareness | .71*** | .21 | .61*** | .11 | .14 | .52*** |  |  |  |  |  |
| 8 | ∆Non-judging | .59*** | .18 | .53*** | -.01 | -.04 | .37** | .47*** |  |  |  |  |
| Measures of stress | |  |  |  |  |  |  |  |  |  |  |  |
| 9 | ∆General stress | -.52*** | -.47*** | -.45** | -.41** | -.23 | -.18 | -.45** | -.31* |  |  |  |
| 10 | ∆Physical stress | -.20 | -.19 | -.34* | -.04 | .06 | .06 | -.31* | -.36** | .33* |  |  |
| 11 | ∆Occupational stress | -.35** | -.35** | -.34* | -.19 | -.04 | -.25+ | -.36** | -.26+ | .22 | .20 |  |
| 12 | ∆PTSD symptoms | -.25+ | -.17 | -.28+ | .02 | .10 | -.14 | -.44*** | -.28* | .36** | .34+ | .34** |

*Note*. *N* = 46.

+ *p* < .10; * *p* < .05; ***p* < .01; ****p* < .001.

**Figures**

**Figure 1**

*Structural equation model with standardized parameter estimates relating change in mindfulness, attention and self-compassion to change in measures of stress*

∆Mindfulness total

∆Attention

∆Self-compassion

∆General stress

∆Physical stress

∆Occupational stress

-.37

-.25

-.38

-.07

.09

-.29

-.18

-.26

-.13

-.13

.21

.09

.30

.10

.62

.85

.58

.78

∆PTSD symptoms

.22

.90

.21

.13

-.23

-.11

-.25

*Note*. Solid lines indicate significant path estimates (*p* < .05), round dot line indicate marginally significant estimates (*p* < .10), and dashed lines indicate nonsignificant path estimates (*p* > .05).

**Figure 2**

*Structural equation model with standardized parameter estimates relating change in facets of mindfulness to change in measures of stress*

∆Observing

∆Non-reactivity

∆Describing

∆Acting with awareness

∆Non-judging

∆General stress

∆Physical stress

∆Occupational stress

-.38

-.10

.21

-.41

-.20

-.09

.04

.38

-.34

-.34

.00

.14

-.04

-.47

-.12

-.01

.16

.08

.32

.23

.52

.47

-.01

.20

.14

.37

-.04

.11

.74

.61

.83

∆PTSD symptoms

.23

.77

.25

.06

-.09

-.27

.11

.06

-.17

*Note*. Solid lines indicate significant path estimates (*p* < .05) and dashed lines indicate nonsignificant path estimates (*p* > .05).
